# Supplementary material for: White light emitting diodes with a high colour rendering index of 98.3 using blue emissive carbon dots
Source: Royal Society of Chemistry journal article supplement (doi:10.1039/d3tc02297h), 2023-01-01
Supplement: d3tc02297h1.pdf [file d3tc02297h1.pdf]

## White Light Emitting Diode with High colour Rendering Index of 98.3 by Blue Emissive Carbon Dots

Lu Zhou<sup>a,#</sup>, Huiyong Wang<sup>a,#</sup>, Hongmei Yu<sup>a,\*</sup>, Eric Amador<sup>c</sup>, Jiajia Xue<sup>d</sup>, Shaoyan Wang<sup>b,\*</sup>, and Wei Chen<sup>c,\*</sup>

<sup>a</sup>School of Chemical Engineering, University of Science and Technology Liaoning, Anshan 114051, China.

<sup>b</sup>Fine Separation Center, University of Science and Technology Liaoning, Anshan 114051, China.

<sup>c</sup>Department of Physics, The University of Texas at Arlington, Arlington, Texas 76019-0059, United States.

<sup>d</sup>State Key Laboratory of Organic-Inorganic Composites, Beijing University of Chemical Technology, Beijing 100029, P. R. China

\*Corresponding authors: seesea0304@163.com, aswys64@163.com, weichen@uta.edu.

#Equal contributor

### SI. Figures

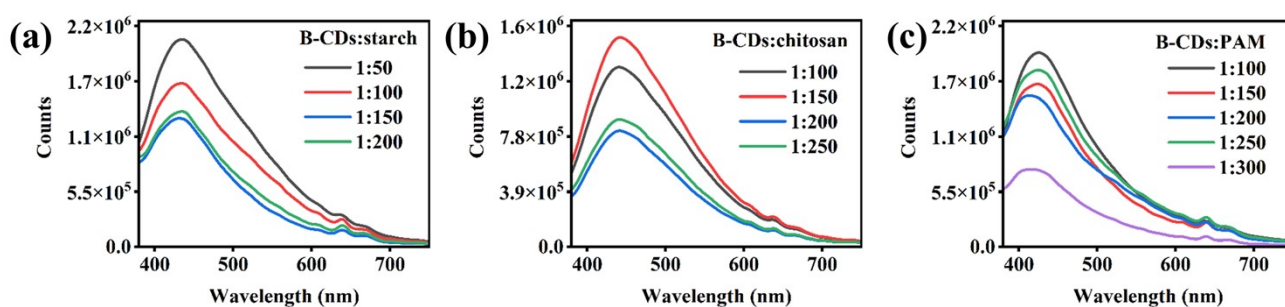

Fig. S1 Fluorescence spectra of CDs/starch, CDs/CTS and CDs/PAM phosphors.

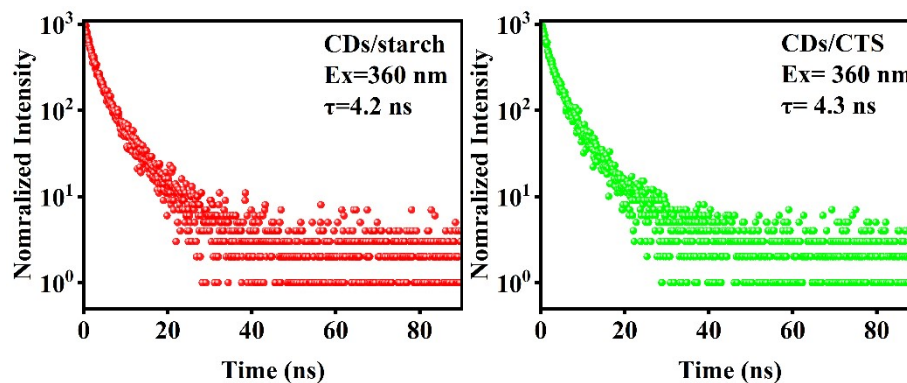

Fig. S2 Fluorescence-decay curves of B-CDs/starch and B-CDs/CTS phosphors.

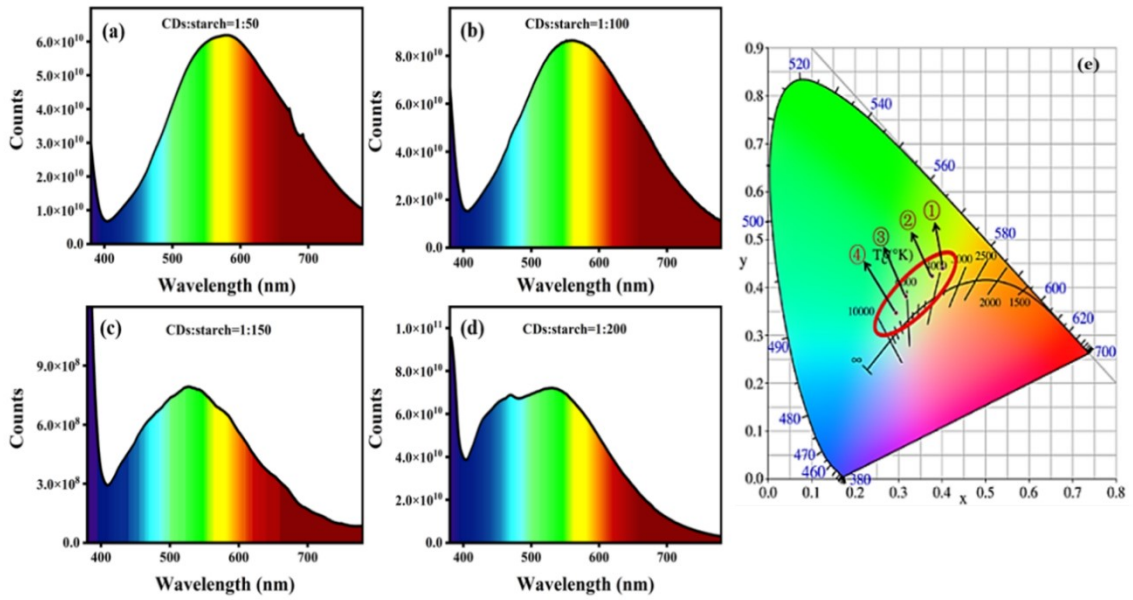

Fig. S3 Fluorescence spectra of B-CDs/starch-based WLED (a-d) at different proportions and corresponding CIE coordinates (e)

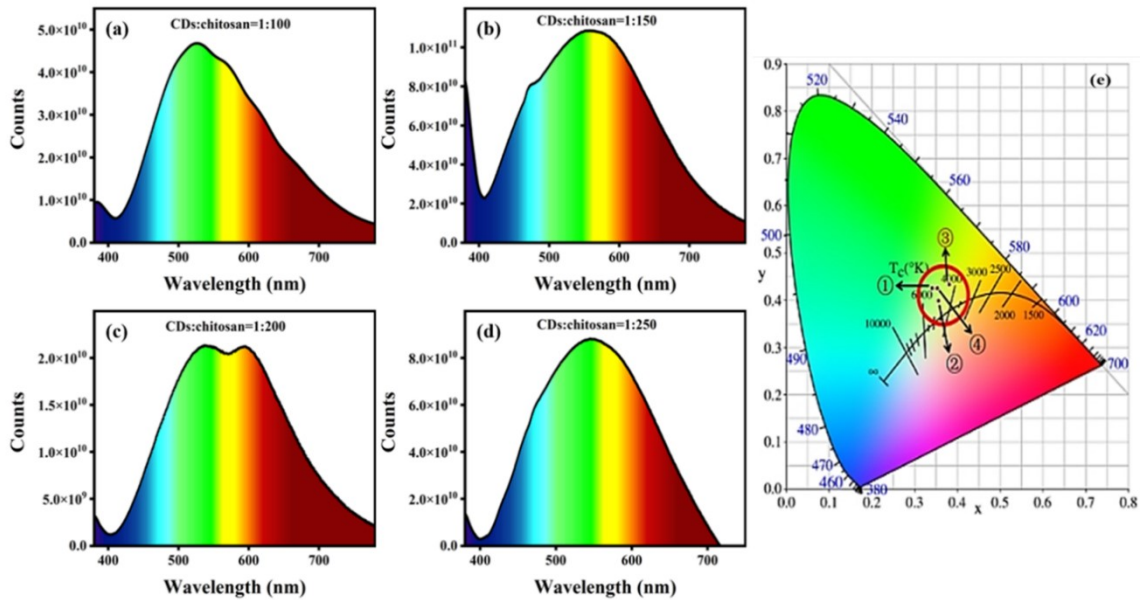

Fig. S4 Fluorescence spectra of B-CDs/CTS-based WLED (a-d) at different proportions and corresponding CIE coordinates (e)

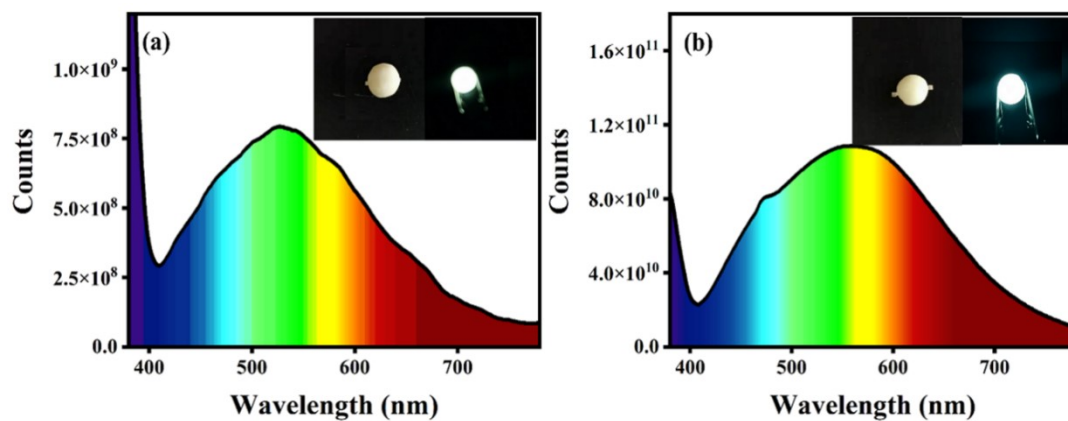

Fig. S5 The fluorescence spectra and images of B-CDs/matrix-based WLED (a) B-CDs/starch and (b) B-CDs/CTS.

## SII. Tables

Table S1. Comparison of lifetime with other CDs applied in WLED

| Name        | Lifetime<br>(ns) | Ref.      |
|-------------|------------------|-----------|
| BCDs@PS     | 3.8              | 1         |
| OCDs@PS     | 4.9              | 1         |
| o-CDs       | 8.98             | 2         |
| G-SiCDs     | 6.63             | 3         |
| R-SiCDs     | 6.85             | 3         |
| S,N-C-dots  | 3.66             | 4         |
| R-CDs       | 6.6              | 5         |
| P-CDs       | 3.73             | 6         |
| R-CDs       | 3.84             | 6         |
| CyCDs       | 7.7              | 7         |
| SW-CPDs     | 3.96             | 8         |
| O-CDs       | 5.03             | 9         |
| G-CDs       | 5.74             | 9         |
| B-CDs       | 1.28             | 9         |
| pm-CDs@DCDA | 4.12 - 4.51      | 10        |
| SSF-CDs     | 4.85             | 11        |
| B-SiCDs     | 4.33             | 12        |
| R-SiCDs     | 3.03             | 12        |
| B-CDs/PAM   | 6.6              | This work |

Table S2 Indices of B-CDs/starch-based WLED in different proportions

| NO. | B-CDs:<br>starch | WLED indicators |        |      |
|-----|------------------|-----------------|--------|------|
|     |                  | CIE             | CCT(K) | CRI  |
| 1   | 1:50             | (0.4014,0.4399) | 3903   | 80.8 |
| 2   | 1:100            | (0.3770,0.4246) | 4348   | 82.7 |
| 3   | 1:150            | (0.3169,0.3817) | 6067   | 80.7 |
| 4   | 1:200            | (0.2950,0.3463) | 7295   | 82.0 |

Table S3 Indices of B-CDs/CTS-based WLED in different proportions

| NO. | B-CDs:<br>CTS | WLED indicators |        |      |
|-----|---------------|-----------------|--------|------|
|     |               | CIE             | CCT(K) | CRI  |
| 1   | 1:100         | (0.3417,0.4254) | 5246   | 77.0 |
| 2   | 1:150         | (0.3564,0.3991) | 4779   | 84.2 |
| 3   | 1:200         | (0.3818,0.4331) | 4283   | 82.9 |
| 4   | 1:250         | (0.3529,0.4260) | 4948   | 75.4 |

## References

1. C. Wang, T. T. Hu, Y. Y. Chen, Y. L. Xu and Q. J. Song, *Acs Applied Materials & Interfaces*, 2019, **11**, 22332-22338.
2. L. Chen, J. X. Zheng, Q. Du, Y. Z. Yang, X. G. Liu and B. S. Xu, *Optical Materials*, 2020, **109**, 110346.
3. Y. F. Wang, K. Wang, Z. X. Han, Z. M. Yin, C. J. Zhou, F. L. Du, S. Y. Zhou, P. Chen and Z. Xie, *Journal of Materials Chemistry C*, 2017, **5**, 9629-9637.
4. W. Zhou, J. L. Zhuang, W. Li, C. F. Hu, B. F. Lei and Y. L. Liu, *Journal of Materials Chemistry C*, 2017, **5**, 8014-8021.
5. X. Q. Zhang, H. Y. Yang, Z. J. Wan, T. Su, X. J. Zhang, J. L. Zhuang, B. F. Lei, Y. L. Liu and C. F. Hu, *Advanced Optical Materials*, 2020, **8**, 2000251.
6. Q. Liu, D. T. Li, Z. F. Zhu, S. M. Yu, Y. Zhang, D. B. Yu and Y. Jiang, *Rsc Advances*, 2018, **8**, 4850-4856.
7. H. J. Wang, W. Y. Hou, Y. W. Hao, W. S. Jiang, H. L. Chen and Q. Q. Zhang, *Spectrochimica Acta Part a-Molecular and Biomolecular Spectroscopy*, 2021, **250**, 119340.
8. Z. F. Wang, Y. Liu, S. J. Zhen, X. X. Li, W. G. Zhang, X. Sun, B. Y. Xu, X. Wang, Z. H. Gao and X. G. Meng, *Advanced Science*, 2020, **7**, 1902688.
9. Y. L. An, C. Liu, Y. Li, M. L. Chen, Y. W. Zheng, H. Tian, R. Shi, X. H. He and X. Lin, *International Journal of Molecular Sciences*, 2022,

**23**, 11071.

10. M. Fu, L. Q. Lin, X. Wang and X. M. Yang, *Journal of Colloid and Interface Science*, 2023, **639**, 78-86.
11. M. Ge, X. Huang, J. X. Ni, Y. Q. Han, C. L. Zhang, S. J. Li, J. Cao, J. Li, Z. J. Chen and S. Y. Han, *Dyes and Pigments*, 2021, **185**, 108953.
12. G. Z. Hu, Y. Wang, S. Zhang, H. Ding, Z. Y. Zhou, J. S. Wei, X. H. Li and H. M. Xiong, *Carbon*, 2023, **203**, 1-10.
